# Supplementary material for: Cooperating dipole–dipole and van der Waals interactions driven 2D self-assembly of fluorenone derivatives: ester chain length effect
Source: Royal Society of Chemistry journal article supplement (doi:10.1039/c7cp06462d), 2017-01-01
Supplement: c7cp06462d1.pdf [file c7cp06462d1.pdf]

## Supporting information

### **Cooperating Dipole–Dipole and van der Waals Interactions Driven 2D Self- Assembly of Fluorenone Derivatives: Ester Chain Length Effect**

Meiqiu Dong, Kai Miao, Yi Hu, Juntian Wu, Jinxing Li, Peng Pang, Xinrui Miao\*, Wenli  
Deng\*

*College of Materials Science and Engineering, South China University of Technology,  
Wushan*

*Road, Tianhe District, Guangzhou 510640, P. R. China.*

*E-mail: msxrmiao@scut.edu.cn; wldeng@scut.edu.cn; Tel: (+86)020-22236708*

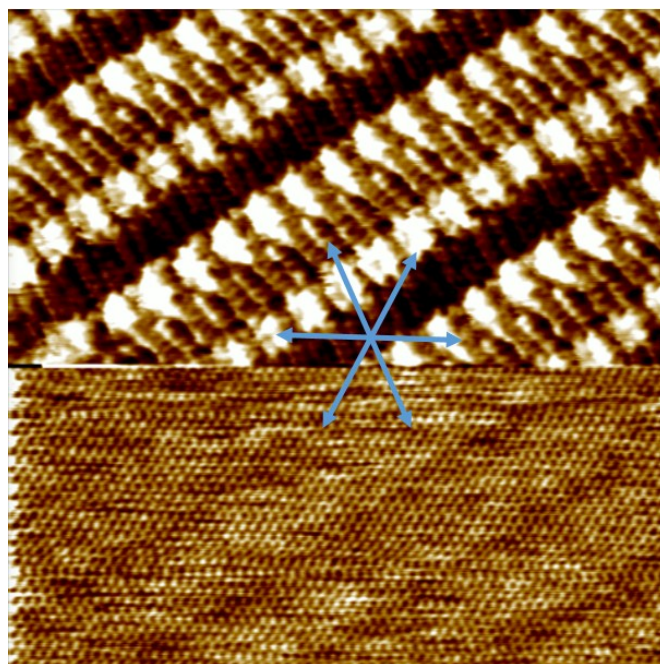

**Figure S1.** High-resolution STM image of coexistent structures of BAF-C1 and HOPG substrate. The white arrows indicate the 3-fold symmetry of the HOPG substrate. Scan area:  $15 \times 15 \text{ nm}^2$ ; Tunneling parameters:  $I_t = 531 \text{ pA}$ ,  $V_b = 676 \text{ mV}$ .

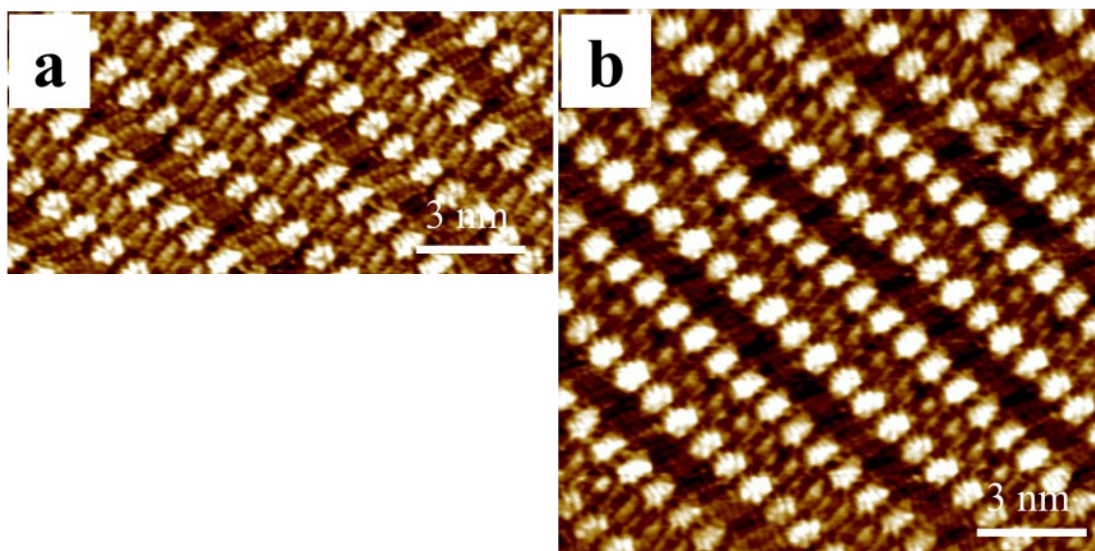

**Figure S2.** High-resolution STM images of BAF-C1 adlayer at 1-phenyloctane /HOPG interface. Tunneling parameters:  $I_t = 524 \text{ pA}$ ,  $V_b = 651 \text{ mV}$ .



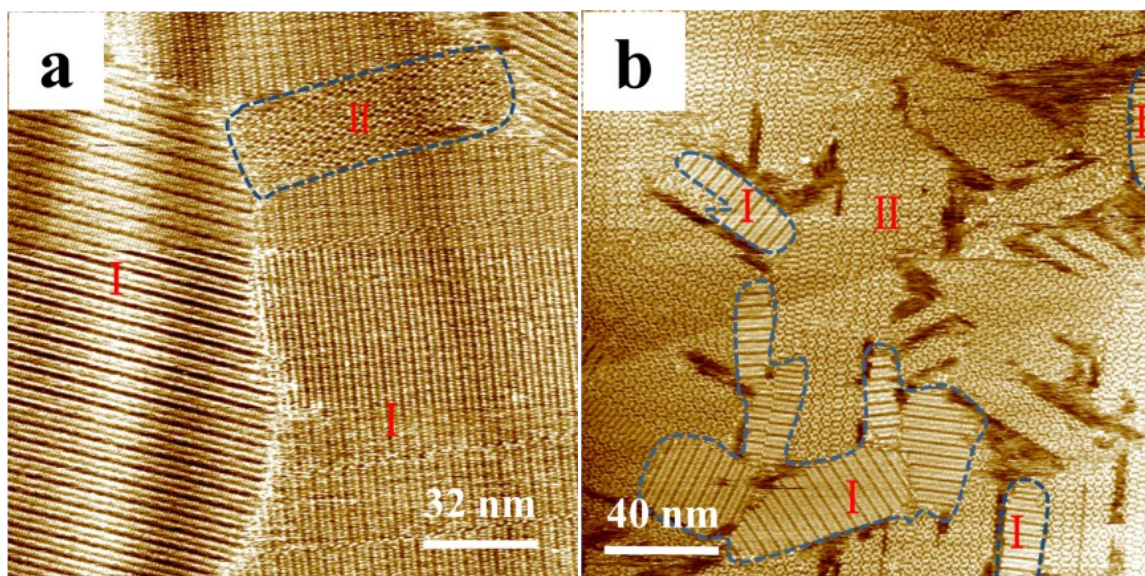

**Figure S3.** Large-scale STM images of self-assembled monolayer for BAF-C3 molecule at 1-phenyloctane/HOPG interface. The coexistent structures of linear I structure (labeled I ) and cyclic structure (labeled II ) of BAF-C3. Tunneling parameters:  $I_t = 536$  pA,  $V_b = 675$  mV.

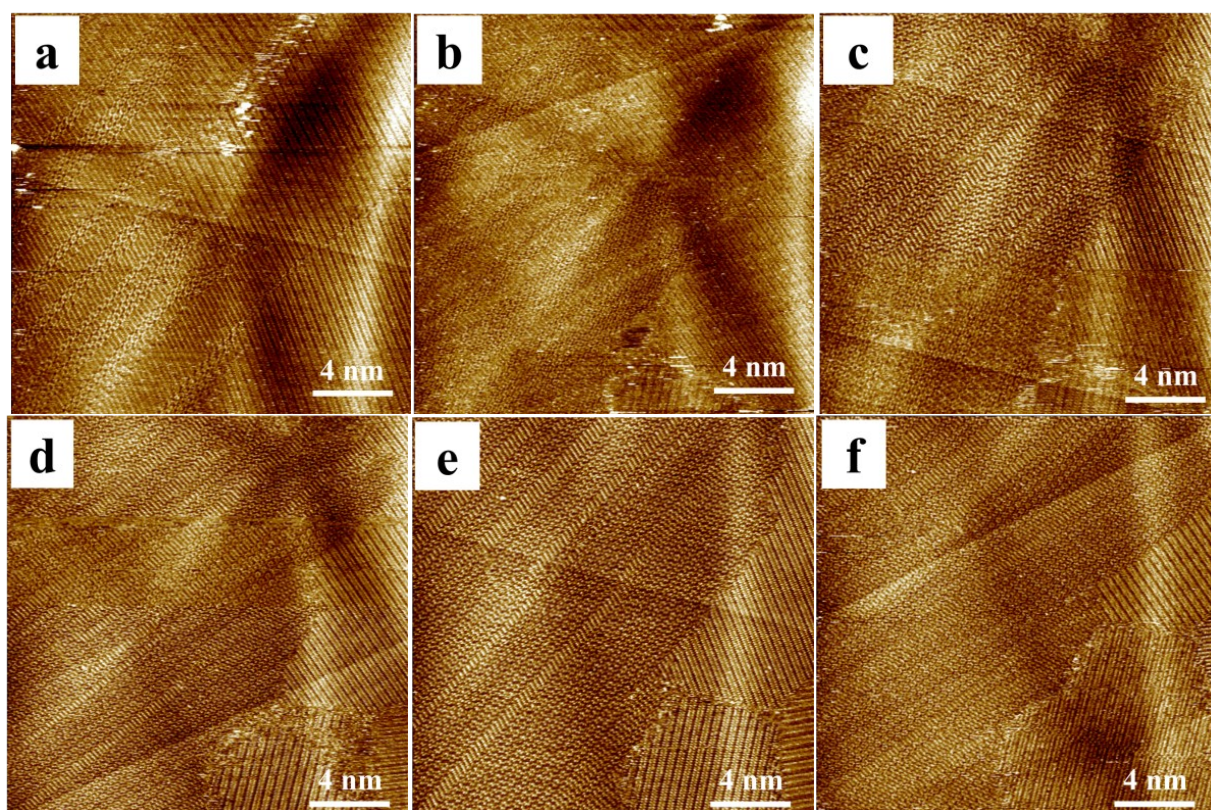

**Figure S4.** Large-scale STM images of self-assembled monolayer for BAF-C3 molecule displaying the gradual growth of linear I structure domains and reduction of cyclic structure



domains at 1-phenyloctane/HOPG interface at mediate concentrations. Tunneling parameters:  $I_t = 450$  pA,  $V_b = 671$  mV.

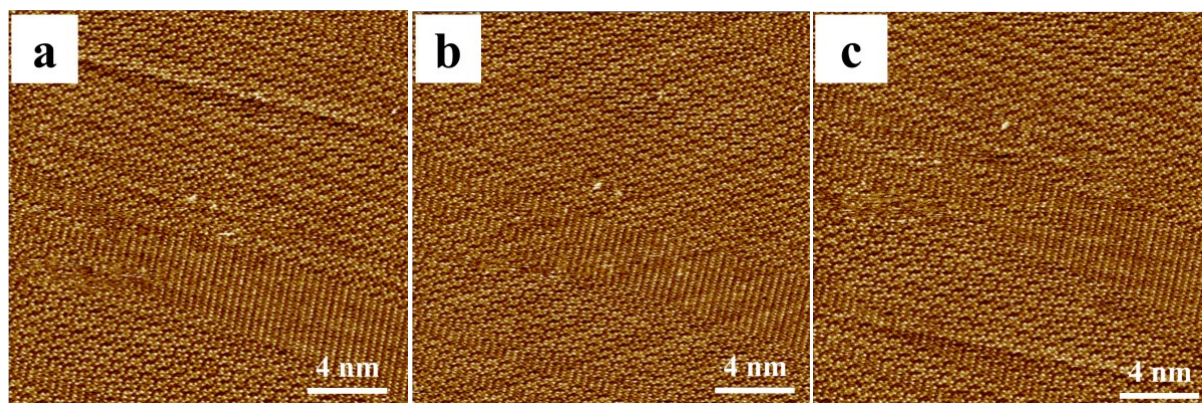

**Figure S5.** Large-scale STM images of self-assembled monolayer for BAF-C3 molecule displaying the gradual growth of cyclic structure domains and reduction of linear I structure domains at 1-phenyloctane/HOPG interface at mediate concentrations. Tunneling parameters:  $I_t = 470$  pA,  $V_b = 653$  mV.

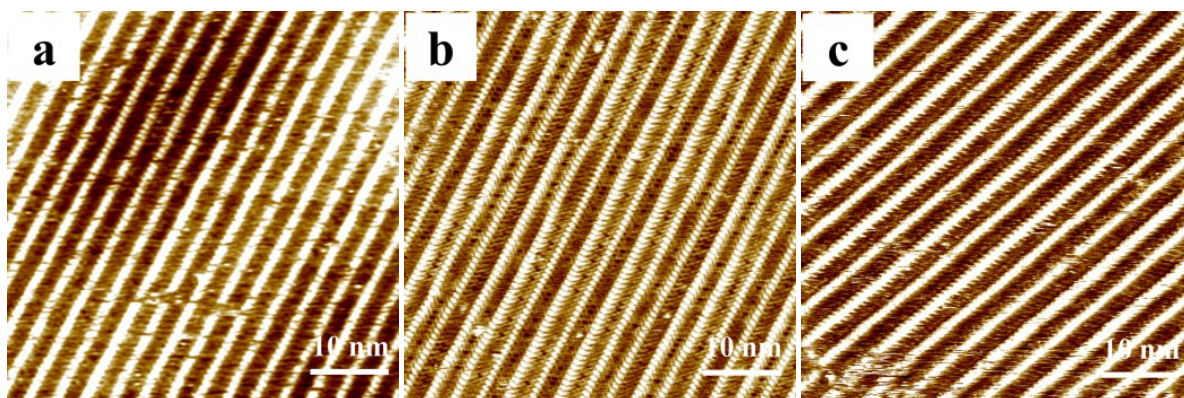

**Figure S6.** (a–c) Large-scale STM images of BAF-C $n$  ( $n = 4–6$ ) showing the linear II pattern at the 1-phenyloctane/HOPG interface. Concentration:  $5.45 \times 10^{-6}$  M; Tunneling parameters:  $I_t = 521$  pA,  $V_b = 650$  mV.
